# Supplementary material for: SMCHD1 regulates a limited set of gene clusters on autosomal chromosomes
Source: PubMed Central journal article supplement (PMC5461771; doi:10.1186/s13395-017-0129-7), 2017-06-06
Supplement: 13395_2017_129_MOESM1_ESM.pdf [file 13395_2017_129_MOESM1_ESM.pdf]

| ID    | Rf.Nr      | M/F | SMCHD1 mutationcDNA<br>(NM_015295.2) | status           | 450K array | RRBS | qPCR | ChIP |
|-------|------------|-----|--------------------------------------|------------------|------------|------|------|------|
| w412  | Rf7.204    | F   | none                                 | Control          | x          |      |      |      |
| w1848 | Rf28.102   | F   | none                                 | Control          | x          |      |      |      |
| r450  | Rf204.306  | F   | none                                 | Control          | x          |      |      |      |
| r74   | Rf208.318  | F   | none                                 | Control          | x          |      |      |      |
| r285  | Rf209.210  | F   | none                                 | Control          | x          |      |      |      |
| r352  | Rf210.104  | F   | none                                 | Control          | x          |      |      |      |
| r63   | Rf268.1    | F   | none                                 | Control          | x          |      |      |      |
| w1825 | Rf300.5    | F   | none                                 | Control          | x          |      |      |      |
| r264  | Rf385.302  | F   | none                                 | Control          | x          |      |      |      |
| r322  | Rf400.2    | F   | none                                 | Control          | x          |      |      |      |
| r650  | Rf649.4    | F   | none                                 | Control          | x          |      |      |      |
| r860  | Rf739.3    | F   | none                                 | Control          | x          |      |      |      |
| b59   | Rf696.2    | F   | none                                 | Control          | x          |      |      |      |
| r795  | Rf742.3    | F   | none                                 | Control          | x          |      |      |      |
| r977  | Rf844.4    | F   | none                                 | Control          | x          |      |      |      |
| b46   | Rf909.2    | F   | none                                 | Control          | x          |      |      |      |
| r997  | Rf910.3    | F   | none                                 | Control          | x          |      |      |      |
| b61   | Rf952.2    | F   | none                                 | Control          | x          |      |      |      |
| b93   | Rf969.1    | F   | none                                 | Control          | x          |      |      |      |
| b323  | Rf1021.5   | F   | none                                 | Control          | x          |      |      |      |
| b288  | Rf1110.2   | F   | none                                 | Control          | x          |      |      |      |
| b480  | Rf1126.202 | F   | none                                 | Control          | x          |      |      |      |
| b567  | Rf1232.4   | F   | none                                 | Control          | x          |      |      |      |
| b609  | Rf629.2    | F   | c.5602C>T                            | Mutation carrier | x          |      |      |      |
| b227  | Rf393.302  | F   | c.1608del                            | Mutation carrier | x          |      |      |      |
| r272  | Rf385.102  | F   | c.5596C>G                            | Mutation carrier | x          |      |      |      |
| r77   | Rf399.3    | F   | c.2068C>T                            | Mutation carrier | x          |      |      |      |
| r837  | Rf683.1    | F   | c.4661T>C                            | Mutation carrier | x          | x    | x    | x    |
| r861  | Rf743.2    | F   | c.182_183dup                         | Mutation carrier | x          |      |      |      |
| r864  | Rf744.4    | F   | unknown                              | Mutation carrier | x          |      |      |      |
| r893  | Rf562.1    | F   | c.2191C>T                            | Mutation carrier | x          |      |      |      |
| r944  | Rf874.3    | F   | c.3274_3276+1del                     | Mutation carrier | x          |      |      |      |
| r950  | Rf878.2    | F   | c.3276+4_3276+7del                   | Mutation carrier | x          |      |      |      |
| r973  | Rf649.3    | F   | c.3801+1G>A                          | Mutation carrier | x          |      |      |      |
| b13   | Rf898.2    | F   | 1,2 Mb deletion SMCHD1               | Mutation carrier | x          |      |      |      |
| b17   | Rf922.2    | F   | c.412C>T                             | Mutation carrier | x          |      |      |      |
| b37   | Rf936.1    | F   | c.3276_3276+4del                     | Mutation carrier | x          |      |      |      |
| b109  | Rf975.201  | F   | c.24del                              | Mutation carrier | x          |      |      |      |
| b206  | Rf1033.1   | F   | c.1302_1306delTGATA                  | Mutation carrier | x          |      | x    | x    |
| b260  | Rf1021.2   | F   | c.1580C>T                            | Mutation carrier | x          |      |      |      |
| b286  | Rf1110.3   | F   | c.3048+2T>C                          | Mutation carrier | x          |      |      |      |
| b376  | Rf392.102  | F   | c.4566G>A                            | Mutation carrier | x          |      |      |      |
| b398  | Rf1014.4   | F   | c.4566G>A                            | Mutation carrier | x          |      |      |      |
| b454  | Rf1101.2   | F   | c.582dupT                            | Mutation carrier | x          |      |      |      |
| b483  | Rf1126.204 | F   | c.4404G>A                            | Mutation carrier | x          |      |      |      |
| b493  | Rf1196.1   | F   | c.1273G>A                            | Mutation carrier | x          |      |      |      |
| b565  | Rf909.206  | F   | c.2665dupA                           | Mutation carrier | x          |      |      |      |
| r730  | Rf745      | F   | none                                 | Control          |            | x    | x    | x    |
| b118  | Rf854      | M   | none                                 | Control          |            | x    |      |      |
| r870  | Rf844      | M   | c.3274_3276+1del                     | Mutation carrier |            | x    | x    | x    |
| b194  | Rf1024     | M   | none                                 | Control          |            |      | x    | x    |
| v96   | Rf899      | M   | none                                 | Control          |            |      | x    | x    |
| b887  | Rf943      | F   | none                                 | Control          |            |      | x    | x    |
| b735  | Rf1033     | F   | c.1302_1306delTGATA                  | Mutation carrier |            |      | x    | x    |
| b206  | Rf1033     | F   | c.1302_1306delTGATA                  | Mutation carrier |            |      | x    | x    |
| r648  | Rf696      | M   | c.1647+3A>G                          | Mutation carrier |            |      | x    | x    |
| r887P | Rf854      | M   | c.3444T>A                            | Mutation carrier |            |      | x    |      |
| r562  | Rf645      | F   | none                                 | Contracted D4Z4  |            |      | x    | x    |
| r707  | Rf731      | F   | none                                 | Contracted D4Z4  |            |      | x    | x    |
| r473  | Rf584      | F   | none                                 | Contracted D4Z4  |            |      | x    |      |
| r603  | Rf675      | F   | none                                 | Contracted D4Z4  |            |      | x    |      |
| r738  | Rf752      | F   | none                                 | Contracted D4Z4  |            |      | x    |      |
| r719  | Rf737      | M   | none                                 | Contracted D4Z4  |            |      | x    |      |
| b22   | Rf925      | F   | none                                 | Contracted D4Z4  |            |      | x    |      |
| r966  | Rf887      | F   | none                                 | Contracted D4Z4  |            |      | x    |      |
| r937  | Rf870      | M   | none                                 | Contracted D4Z4  |            |      | x    |      |
| r218  | Rf353      | F   | none                                 | Contracted D4Z4  |            |      | x    |      |

Cells which contain two 4QB alleles used for SMCHD1 KD

| ID   | Rf.Nr  | M/F | SMCHD1 mutationcDNA<br>(NM_015295.2) | 4q allele 1 | 4q allele 2 |
|------|--------|-----|--------------------------------------|-------------|-------------|
| r879 | Rf852  | M   | none                                 | B           | B           |
| b194 | Rf1024 | M   | none                                 | B           | B           |
| b94  | Rf964  | F   | none                                 | B           | B           |
