# Supplementary material for: SMCHD1 regulates a limited set of gene clusters on autosomal chromosomes
Source: PubMed Central journal article supplement (PMC5461771; doi:10.1186/s13395-017-0129-7), 2017-06-06
Supplement: 13395_2017_129_MOESM3_ESM.pdf [file 13395_2017_129_MOESM3_ESM.pdf]

| chrom. | start     | end       | Nearest gene                            | Effect size  | #CpGs |
|--------|-----------|-----------|-----------------------------------------|--------------|-------|
| chr2   | 176982108 | 176982342 | HOXD10 (+733)                           | -0.061011884 | 3     |
| chr3   | 147077186 | 147077671 | PLSCR1 (-814,801), ZIC4 (+44,642)       | 0.032308901  | 7     |
| chr3   | 147111280 | 147112143 | PLSCR1 (-849,084), ZIC4 (+10,359)       | 0.027142669  | 6     |
| chr3   | 147131069 | 147131617 | ZIC1 (+4,162)                           | 0.026977624  | 5     |
| chr3   | 147142182 | 147142355 | ZIC1 (+15,088)                          | 0.054174877  | 3     |
| chr5   | 1962311   | 1962554   | IRX4 (-79,553), IRX2 (+789,336)         | -0.129595712 | 3     |
| chr5   | 42944267  | 42944494  | SEPP1 (-132,357), C5orf39 (+96,066)     | 0.063034933  | 3     |
| chr5   | 140174449 | 140174887 | PCDHAC2 (-171,079), ZMAT2 (+94,636)     | -0.086167593 | 5     |
| chr5   | 140180691 | 140181074 | PCDHAC2 (-164,864), ZMAT2 (+100,851)    | -0.064843346 | 5     |
| chr5   | 140213825 | 140214328 | PCDHAC2 (-131,670), ZMAT2 (+134,045)    | -0.076618858 | 5     |
| chr5   | 140248564 | 140249080 | PCDHAC2 (-96,925), ZMAT2 (+168,790)     | -0.110398562 | 5     |
| chr5   | 140305947 | 140306458 | PCDHAC2 (-39,544), ZMAT2 (+226,171)     | -0.032544589 | 10    |
| chr5   | 140474005 | 140475652 | PCDHB2 (+592)                           | -0.090184933 | 13    |
| chr5   | 140502903 | 140503914 | PCDHB5 (-11,391), PCDHB4 (+1,828)       | -0.079232952 | 6     |
| chr5   | 140517239 | 140517411 | PCDHB6 (-12,514), PCDHB5 (+2,525)       | -0.107149392 | 3     |
| chr5   | 140529499 | 140530028 | PCDHB6 (-75)                            | -0.072071447 | 7     |
| chr5   | 140530410 | 140532058 | PCDHB17 (-4,346)                        | -0.104055883 | 8     |
| chr5   | 140535215 | 140536496 | PCDHB17 (+276)                          | -0.103731987 | 10    |
| chr5   | 140536920 | 140537705 | PCDHB7 (-14,930), PCDHB17 (+1,733)      | -0.095577312 | 3     |
| chr5   | 140553091 | 140554819 | PCDHB8 (-3,416)                         | -0.093035569 | 7     |
| chr5   | 140559576 | 140559871 | PCDHB16 (-1,256)                        | -0.090130314 | 3     |
| chr5   | 140562034 | 140562819 | PCDHB9 (-4,466)                         | -0.104749247 | 6     |
| chr5   | 140568217 | 140569144 | PCDHB10 (-3,271)                        | -0.076468231 | 6     |
| chr5   | 140573574 | 140574095 | PCDHB11 (-5,513), PCDHB10 (+1,883)      | -0.052873883 | 3     |
| chr5   | 140595009 | 140595879 | PCDHB14 (-7,634), PCDHB13 (+1,935)      | -0.092306012 | 5     |
| chr5   | 140614727 | 140615656 | PCDHB15 (-9,955), PCDHB18 (+1,254)      | -0.090836751 | 5     |
| chr5   | 140625848 | 140627399 | PCDHB15 (+1,477), SLC25A2 (+56,988)     | -0.078093722 | 5     |
| chr5   | 140700583 | 140700662 | TAF7 (-272)                             | -0.032718164 | 4     |
| chr5   | 140718339 | 140719142 | PCDHGC5 (-150,067), TAF7 (-18,390)      | -0.066598696 | 6     |
| chr5   | 140719962 | 140720426 | PCDHGC5 (-148,614), TAF7 (-19,843)      | -0.076945021 | 4     |
| chr5   | 140723509 | 140725147 | PCDHGC5 (-144,480), TAF7 (-23,977)      | -0.076660868 | 12    |
| chr5   | 140729653 | 140730092 | PCDHGC5 (-138,935), TAF7 (-29,522)      | -0.084473646 | 5     |
| chr5   | 140731308 | 140731930 | PCDHGC5 (-137,189), TAF7 (-31,268)      | -0.066408947 | 3     |
| chr5   | 140734721 | 140735397 | PCDHGC5 (-133,749), TAF7 (-34,708)      | -0.053784962 | 6     |
| chr5   | 140736762 | 140737111 | PCDHGC5 (-131,871), TAF7 (-36,586)      | -0.071199968 | 5     |
| chr5   | 140739522 | 140740387 | PCDHGC5 (-128,853), TAF7 (-39,604)      | -0.096161819 | 5     |
| chr5   | 140743927 | 140744367 | PCDHGC5 (-124,661), TAF7 (-43,796)      | -0.061752996 | 4     |
| chr5   | 140745340 | 140746162 | PCDHGC5 (-123,057), TAF7 (-45,400)      | -0.070024992 | 5     |
| chr5   | 140749735 | 140750160 | PCDHGC5 (-118,860), TAF7 (-49,597)      | -0.069151666 | 6     |
| chr5   | 140751454 | 140751608 | PCDHGC5 (-117,277), TAF7 (-51,180)      | -0.085659405 | 3     |
| chr5   | 140753415 | 140753924 | PCDHGC5 (-115,138), TAF7 (-53,319)      | -0.074974007 | 10    |
| chr5   | 140761259 | 140764302 | PCDHGC5 (-106,027), TAF7 (-62,430)      | -0.108179338 | 10    |
| chr5   | 140767200 | 140769440 | PCDHGC5 (-100,488), TAF7 (-67,969)      | -0.083170482 | 14    |
| chr5   | 140772182 | 140772859 | PCDHGC5 (-96,287), TAF7 (-72,170)       | -0.111259103 | 7     |
| chr5   | 140773864 | 140774440 | PCDHGC5 (-94,656), TAF7 (-73,801)       | -0.131794116 | 4     |
| chr5   | 140777344 | 140779461 | PCDHGC5 (-90,405), TAF7 (-78,052)       | -0.100285737 | 13    |
| chr5   | 140782297 | 140783173 | PCDHGC5 (-86,073), TAF7 (-82,384)       | -0.086243068 | 6     |
| chr5   | 140787430 | 140788504 | TAF7 (-87,616), PCDHGC5 (-80,841)       | -0.048633702 | 6     |
| chr5   | 140789247 | 140789745 | TAF7 (-89,145), PCDHGC5 (-79,312)       | -0.094304829 | 4     |
| chr5   | 140792558 | 140793307 | TAF7 (-92,582), PCDHGC5 (-75,875)       | -0.059267648 | 8     |
| chr5   | 140794664 | 140794993 | TAF7 (-94,478), PCDHGC5 (-73,979)       | -0.134057819 | 3     |
| chr5   | 140797509 | 140799572 | TAF7 (-98,190), PCDHGC5 (-70,267)       | -0.111293932 | 10    |
| chr5   | 140801354 | 140802831 | TAF7 (-101,742), PCDHGC5 (-66,715)      | -0.102576925 | 7     |
| chr5   | 140810109 | 140811253 | TAF7 (-110,330), PCDHGC5 (-58,127)      | -0.096306705 | 13    |
| chr5   | 140892308 | 140893634 | PCDHGC5 (+24,163), DIAPH1 (+105,651)    | 0.096740316  | 5     |
| chr6   | 379489    | 379581    | IRF4 (-12,204), DUSP22 (+87,434)        | -0.09868766  | 3     |
| chr7   | 57927758  | 57927793  | ZNF716 (+417,893)                       | -0.059886956 | 3     |
| chr7   | 63151988  | 63153149  | LOC643955 (-388,135), ZNF727 (-353,252) | -0.03772025  | 3     |

|       |           |           |                                          |              |   |
|-------|-----------|-----------|------------------------------------------|--------------|---|
| chr7  | 63361127  | 63361617  | LOC643955 (-596,938), ZNF727 (-144,449)  | -0.091046653 | 5 |
| chr7  | 63385990  | 63387147  | LOC643955 (-622,135), ZNF727 (-119,252)  | -0.082389573 | 7 |
| chr8  | 22560972  | 22561719  | EGR3 (-10,531), PEBP4 (+224,075)         | 0.055866628  | 6 |
| chr8  | 144360667 | 144362100 | ZNF696 (-12,175), GLI4 (+11,777)         | -0.123147931 | 4 |
| chr8  | 144371537 | 144371779 | ZNF696 (-1,901)                          | -0.157532087 | 3 |
| chr12 | 114841202 | 114841870 | RBM19 (-437,360), TBX5 (+2,353)          | 0.033705495  | 6 |
| chr12 | 115122028 | 115122157 | TBX3 (-124)                              | -0.010921959 | 5 |
| chr13 | 36052768  | 36053408  | MAB21L1 (+462,294), NBEA (+536,664)      | 0.04949918   | 4 |
| chr13 | 112838022 | 112838611 | SPACA7 (-192,334), SOX1 (+116,404)       | -0.105336476 | 6 |
| chr14 | 61748243  | 61748354  | TMEM30B (+231)                           | 0.055035436  | 3 |
| chr15 | 23157727  | 23157832  | GOLGA8IP (-97,462), NIPA1 (-71,344)      | 0.064704265  | 3 |
| chr15 | 96873850  | 96874050  | NR2F2 (-161)                             | -0.01625825  | 8 |
| chr15 | 96904723  | 96905576  | NR2F2 (+31,039)                          | 0.042171742  | 5 |
| chr16 | 32822612  | 32823584  | TP53TG3C (-135,650), SLC6A10P (+68,824)  | -0.079642512 | 4 |
| chr16 | 32857347  | 32858241  | TP53TG3C (-170,346), SLC6A10P (+34,128)  | -0.09859056  | 5 |
| chr16 | 33039897  | 33040275  | TP53TG3B (-165,499), SLC6A10P (-148,164) | -0.07908879  | 3 |
| chr16 | 83171068  | 83171314  | HSBP1 (-670,402), CDH13 (+510,792)       | -0.156549444 | 4 |
| chr17 | 25289961  | 25290310  | WSB1 (-330,970)                          | -0.17853885  | 3 |
| chr17 | 46682308  | 46682394  | HOXB6 (-17)                              | -0.11963952  | 4 |
| chr19 | 51227943  | 51228937  | GPR32 (-45,418), CLEC11A (+1,835)        | -0.019204144 | 5 |
| chr19 | 54515169  | 54515341  | CACNG6 (+19,713), VSTM1 (+51,952)        | 0.08593187   | 4 |
| chr22 | 16867554  | 16868045  | OR11H1 (-417,996), CCT8L2 (+205,900)     | -0.061636861 | 4 |
