# Supplementary material for: SMCHD1 regulates a limited set of gene clusters on autosomal chromosomes
Source: PubMed Central journal article supplement (PMC5461771; doi:10.1186/s13395-017-0129-7), 2017-06-06

A

## Myoblast

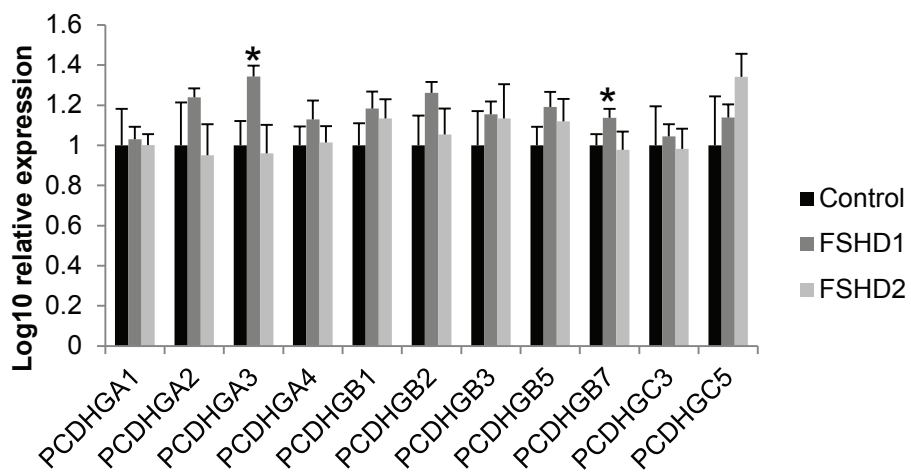

B

## Myotube

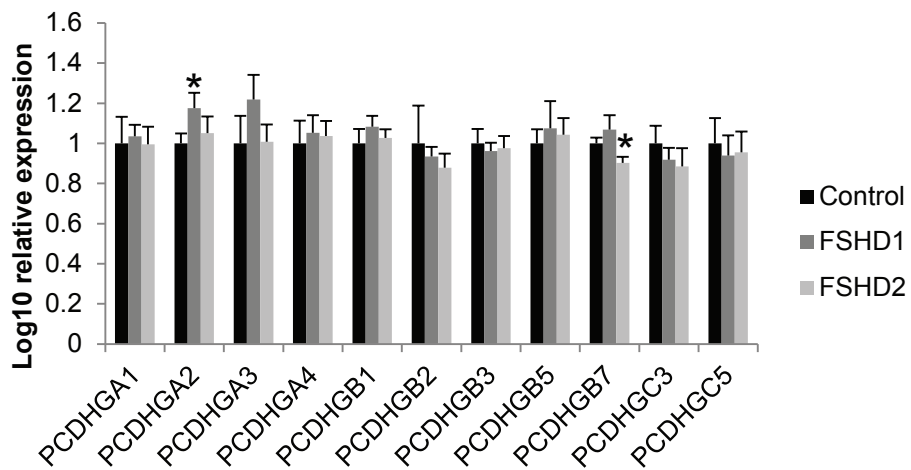

Supplement: 13395_2017_129_MOESM6_ESM.pdf [file 13395_2017_129_MOESM6_ESM.pdf]
