# Supplementary material for: SMCHD1 regulates a limited set of gene clusters on autosomal chromosomes
Source: PubMed Central journal article supplement (PMC5461771; doi:10.1186/s13395-017-0129-7), 2017-06-06
Supplement: 13395_2017_129_MOESM7_ESM.pdf [file 13395_2017_129_MOESM7_ESM.pdf]

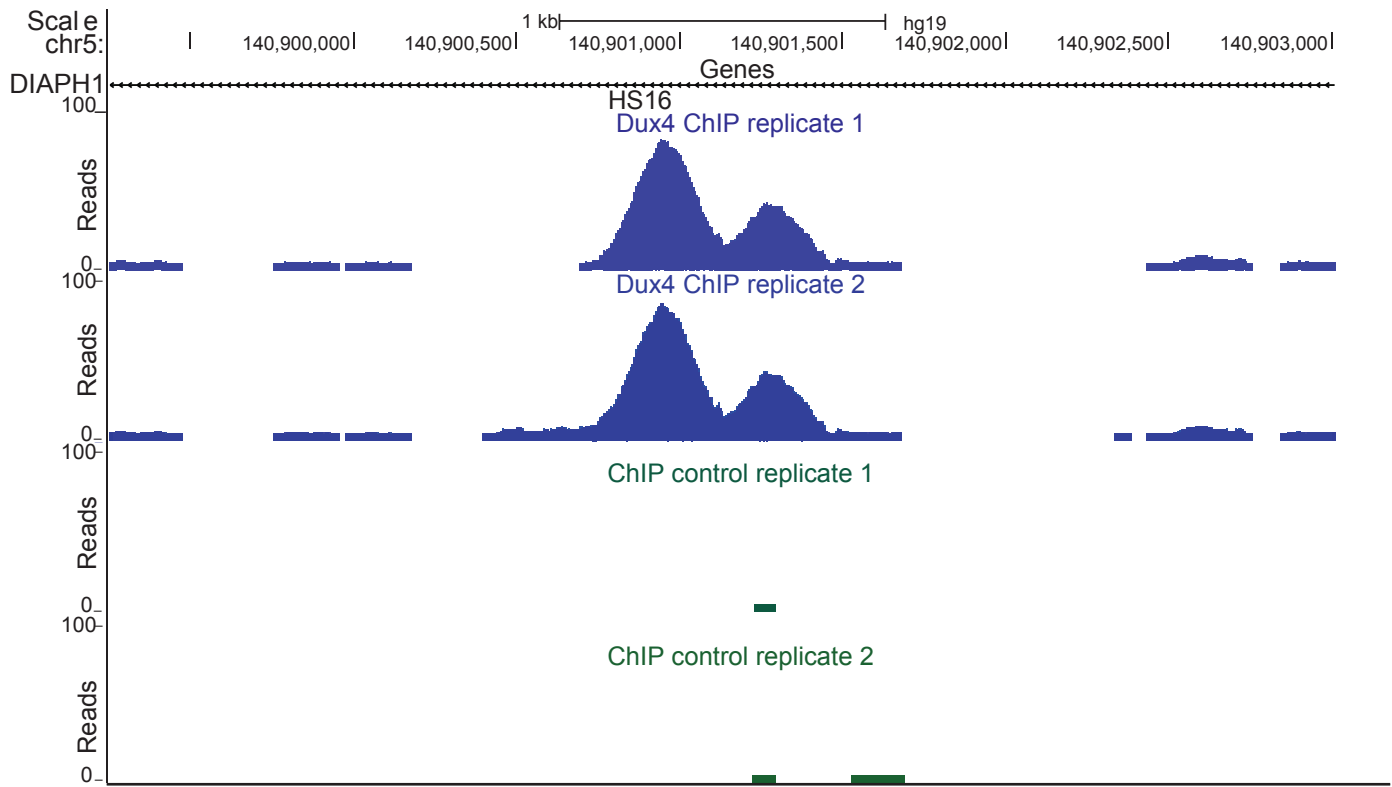

DNA zoom

DUX4 binding motif:

CATGGGCCTGAAATAGCAGCTG**TAATACAATCA**CATGGATTCTCCCCTTGACACTCCA
